# Supplementary material for: Large-scale synthesis and structural analysis of a synthetic glycopeptide dendrimer as an anti-cancer vaccine candidate
Source: Royal Society of Chemistry journal article supplement (doi:10.1039/c6ob01931e), 2016-10-20
Supplement: c6ob01931e1.pdf [file c6ob01931e1.pdf]

## SUPPLEMENTARY INFORMATION

### Supplemental data, related to NMR results (detailed NMR analyses)

**Chemical shift analysis.** The four MAG-Tn3 glycosylated peptidic chains were identified as random coil regions on the basis of the chemical shift index (CSI).<sup>1</sup> Indeed large random coil index (RCI) values (*i.e.*, from 0.15 up to 0.5) were obtained for residues 1-18 (Fig. S4)<sup>2</sup> with smaller RCI values from Ser\*1 to Lys7, suggesting more restricted motions for this segment. In addition, the slightly larger RCI values obtained for residues 15-18 of the b and b' chains compared to those of the a and a' ones are consistent with the increased flexibility of the lysine side chains compared to that of their peptide backbone. A comparison with two monomeric analogues (*i.e.*, glycopeptide S\*T\*T\*-TT peptide and its non-glycosylated counterpart) indicates that the behaviour of the MAG-Tn3 glycosylated peptide chains is similar to that of the linear glycopeptide, whereas larger RCI values are observed at *N*-ter from Ser1 to Ala8 for the non-glycosylated peptide (Table S1B, C and Fig. S4). These results suggest that the  $\alpha$ -glycosylation at *N*-ter locally induces reduced flexibility. Moreover, the  $\Phi$  and  $\Psi$  backbone torsion angles indicate a preferred extended conformation for residues Thr2\* to Ile6 (with  $\Phi$  and  $\Psi$  mean values of  $-120 \pm 18$  and  $137 \pm 13$ , respectively), whereas residues 7-17 are classified as dynamic (with  $\Phi$  and  $\Psi$  mean values of  $-89 \pm 58$  and  $131 \pm 29$ , respectively).<sup>3</sup>

**Coupling constants analysis.** Because of signal overlaps, only a few peptide backbone  $^3J_{\text{NH,H}\alpha}$  coupling constants could be extracted; most of the obtained values were between 5.6 and 7.3 Hz, implying the absence of a stable secondary structure (Fig. S3). However, larger values of 9.0 Hz were observed for the glycosylated residues (*i.e.*, Thr2\* and Thr3\*), corresponding to a  $\Phi$  torsion angle of approximately  $-120^\circ$ , which is consistent with that found in an extended conformation.<sup>4</sup> The  $^3J_{\text{NH,H}\alpha}$  coupling constants measured under the same experimental conditions used for the two linear glycosylated and non-glycosylated analogues were 9.0 and 8.9 Hz for Thr2\* and Thr3\*, respectively, whereas smaller values of 7.0 and 7.6 Hz were obtained for Thr2 and Thr3, respectively. These results show that this local extended conformation was induced by the  $\alpha$ -glycosylation of the threonine residues. In addition, the small  $^3J_{\text{H}\alpha,\text{H}\beta}$  values (approximately 3 Hz) observed for the glycosylated Thr2\* and Thr3\* suggest a limited set of possible values for the  $\chi^1$  torsion angle (N-C $\alpha$ -C $\beta$ -O<sub>sugar</sub>). Similarly, the  $^3J_{\text{H}\alpha,\text{H}\beta}$  and  $^3J_{\text{H}\alpha,\text{H}\beta'}$  values measured for the glycosylated Ser1\* (4.3 and 5.1 Hz) were smaller than those (5.4 and 6.1 Hz) obtained for the non-glycosylated Ser10 with no conformational preference. Finally, the large  $^3J_{\text{NH,H}2}$  values of 9.6 and 9.7 Hz (Table S1A) obtained for all of the GalNAc residues correspond to torsion angles of approximately  $180^\circ$  between the H2 and NH protons, indicating a preferred orientation for the *N*-acetyl group, as previously reported.<sup>5-7</sup>

**$^1\text{H}, ^1\text{H}$  NOEs.** The observation of strong  $d\alpha\text{N}(i,i+1)$  NOEs for the stretch of residues from Ser1\* to Ile15 and medium  $d\text{NN}(i,i+1)$  NOEs from Ile6 to Phe12 indicates that this central peptidic segment (Ile6-Phe12) is in an unfolded state. In contrast, the  $d\text{NN}(i,i+1)$  NOEs from Thr2\* to Ile6 are absent or weaker, suggesting a preference for an extended conformation in this *N*-ter region (Fig. S3). Besides, the small to medium NOEs observed between the NH proton of the GalNAc residues and the amide proton of the corresponding linked threonine residues (GalNAc2 NH/Thr2\* NH and GalNAc3 NH/Thr3\* NH) indicate that the torsion angles  $\Psi$ s (C1<sub>s</sub>-O1<sub>s</sub>-C $\beta$ -C $\alpha$ ) adopt values close to  $120^\circ$ , reflecting an eclipsed conformation of the GalNAc-Thr linkage (Table S3).<sup>7,8</sup> In addition, the presence of weak or medium NOEs between the protons of GalNAc3, which are primarily due to its *N*-acetyl group, and the AA protons from the Thr3\* to Tyr5 residues confirms a privileged orientation of the *N*-acetyl group relative to the peptidic chain and glycosylation-induced stiffening at *N*-ter to Tyr5.

## Supplementary Figures and Tables

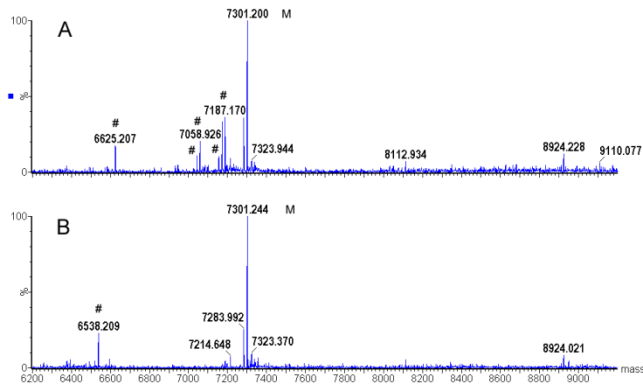

**Fig. S1.** ESMS analysis of crude peptide **2** synthesized without (A) or with (B) pseudoproline dipeptides (deconvoluted spectra, calcd  $M_r$  7,301.630). # = deletion products.

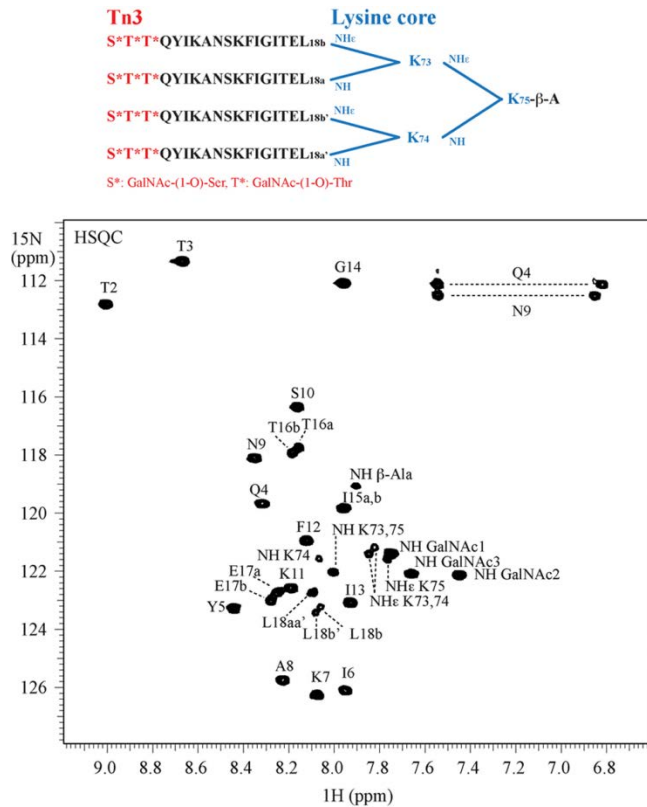

**Fig. S2.**  $^1\text{H}$ - $^{15}\text{N}$  HSQC spectrum of MAG-Tn3.

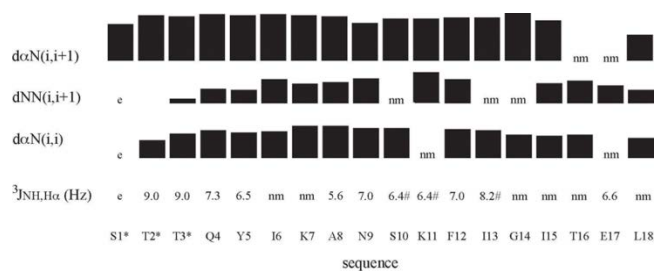

**Fig. S3.**  $^3J_{NH,H\alpha}$  coupling constants in Hz and sequential and medium-range  $^1H, ^1H$  NOEs measured for MAG-Tn3. The thickness of the lines is proportional to the intensity of the NOEs. # coupling constants measured from 2D NOESY; nm: not measurable due to overlap; e: exchanged  $NH_2$  terminal.

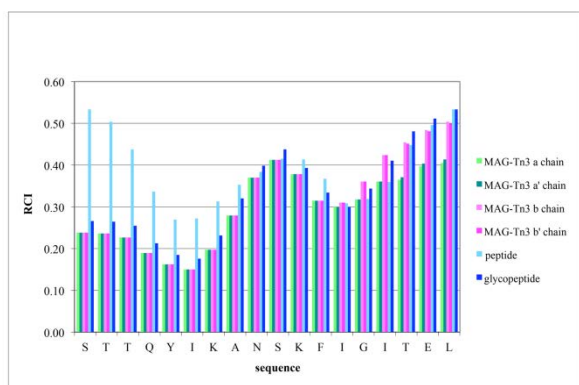

**Fig. S4.** Random Coil Index (RCI) for MAG-Tn3, the linear glycopeptide S\*T\*T\*QYIKANSKFIGITEL and its non glycosylated analogue.

**Table S1.**

A)  $^1\text{H}$ ,  $^{13}\text{C}$  and  $^{15}\text{N}$  NMR chemical shifts (in ppm) and coupling constants ( $J_{\text{H,H}}$  in Hz) for the MAG-Tn3 GalNAc residues

|                                          | H1<br>$^3J_{1,2}$<br>C1             | H2<br>$^3J_{2,3}$<br>C2           | H3<br>$^3J_{3,4}$<br>C3          | H4<br>$^3J_{4,5}$<br>C4       | H5<br>C5       | H66'<br>C6         | H (Ac)<br>C    | H (NH)<br>$^3J_{\text{NH,H2}}$<br>N |
|------------------------------------------|-------------------------------------|-----------------------------------|----------------------------------|-------------------------------|----------------|--------------------|----------------|-------------------------------------|
| $\alpha$ -GalNAc-(1- <i>O</i> )-<br>Ser1 | 4.826<br>4.1 <sup>a</sup><br>101.07 | 4.136<br>10 <sup>b</sup><br>52.33 | 3.847<br>4 <sup>b</sup><br>70.76 | 3.954<br>$\approx 0$<br>71.30 | 3.925<br>74.42 | 3.74-3.80<br>64.18 | 1.999<br>24.99 | 7.760<br>9.6 <sup>a</sup><br>121.40 |
| $\alpha$ -GalNAc-(1- <i>O</i> )-<br>Thr2 | 4.832<br>4.1 <sup>a</sup><br>101.93 | 4.047<br>10 <sup>b</sup><br>52.49 | 3.828<br>4 <sup>b</sup><br>70.96 | 3.941<br>$\approx 0$<br>71.30 | 3.958<br>74.08 | 3.72-3.75<br>64.11 | 2.018<br>25.21 | 7.457<br>9.7 <sup>a</sup><br>122.14 |
| $\alpha$ -GalNAc-(1- <i>O</i> )-<br>Thr3 | 4.862<br>3.8 <sup>a</sup><br>101.50 | 4.115<br>10 <sup>b</sup><br>52.43 | 3.806<br>4 <sup>b</sup><br>71.10 | 3.958<br>$\approx 0$<br>71.30 | 3.958<br>74.08 | 3.72-3.75<br>64.11 | 2.033<br>25.21 | 7.671<br>9.6 <sup>a</sup><br>122.05 |

<sup>a</sup>Digital resolution 1D  $^1\text{H}$  spectrum : 0.2 Hz. <sup>b</sup>Digital resolution 2D  $^1\text{H}$  COSY and TOCSY spectra : 1.5 Hz.

$^1\text{H}$ ,  $^{13}\text{C}$  and  $^{15}\text{N}$  NMR chemical shifts (in ppm) of the MAG-Tn3 amino acid residues

|      | H <sub>N</sub><br>N | H $\alpha$<br>C $\alpha$ | H $\beta$<br>C $\beta$ | H $\gamma$<br>C $\gamma$ | H $\delta$<br>C $\delta$ | Other                                   |
|------|---------------------|--------------------------|------------------------|--------------------------|--------------------------|-----------------------------------------|
| Ser* | 1                   | 4.461<br>55.83           | 4.221-3.990<br>69.13   |                          |                          |                                         |
| Thr* | 2                   | 9.012<br>112.82          | 4.780<br>59.98         | 4.393<br>79.98           | 1.292<br>21.14           |                                         |
| Thr* | 3                   | 8.671<br>111.33          | 4.517<br>59.33         | 4.212<br>79.03           | 1.174<br>20.99           |                                         |
| Gln  | 4                   | 8.327<br>119.66          | 4.295<br>55.24         | 1.983-1.878<br>30.53     | 2.300<br>33.77           | 7.550-6.821 NH <sub>2</sub><br>112.12   |
| Tyr  | 5                   | 8.449<br>123.27          | 4.456<br>58.06         | 2.990-2.881<br>38.83     |                          | 7.111 $\delta$ CH<br>133.51             |
| Ile  | 6                   | 7.957<br>126.09          | 3.989<br>60.42         | 1.687<br>38.98           | 1.367-1.061<br>27.15     | 0.773<br>12.68                          |
| Lys  | 7                   | 8.079<br>126.25          | 4.106<br>56.43         | 1.754-1.675<br>32.97     | 1.397<br>24.84           | 1.677<br>29.27                          |
| Ala  | 8                   | 8.230<br>125.76          | 4.242<br>52.60         | 1.348<br>19.29           |                          |                                         |
| Asn  | 9                   | 8.354<br>118.12          | 4.665<br>53.28         | 2.822-2.746<br>38.83     |                          | 7.549-6.864 NH <sub>2</sub><br>112.52   |
| Ser  | 10                  | 8.166<br>116.37          | 4.364<br>58.66         | 3.849-3.788<br>63.87     |                          |                                         |
| Lys  | 11                  | 8.194<br>122.58          | 4.231<br>56.49         | 1.636<br>32.99           | 1.252<br>24.63           | 1.581<br>29.03                          |
| Phe  | 12                  | 8.129<br>120.94          | 4.629<br>57.56         | 3.084-2.964<br>39.60     |                          |                                         |
| Ile  | 13                  | 7.934<br>123.08          | 4.112<br>61.12         | 1.794<br>38.84           | 1.392-1.112<br>27.20     | 0.802<br>12.96                          |
| Gly  | 14                  | 7.952<br>112.08          | 3.887<br>45.33         |                          |                          |                                         |
| Ile  | 15a                 | 7.954<br>119.81          | 4.258<br>61.30         | 1.862<br>39.01           | 1.433-1.157<br>27.36     | 0.829<br>13.22                          |
|      | 15b                 | 7.971<br>117.95          | 4.323<br>62.18         | 4.164                    |                          | 0.885 $\gamma$ CH <sub>3</sub><br>17.69 |
| Thr  | 16a                 | 8.154<br>117.76          | 4.291<br>62.41         | 4.141<br>69.71           | 1.155<br>21.65           |                                         |
|      | 16b                 | 8.195                    | 4.323                  | 4.164                    |                          |                                         |

|              |     |        |             |             |           |             |                                        |
|--------------|-----|--------|-------------|-------------|-----------|-------------|----------------------------------------|
| Glu          | 17a | 117.95 | 62.18       | 2.017-1.923 | 2.307     |             |                                        |
|              |     | 8.251  | 4.321       |             |           |             |                                        |
|              | 17b | 122.71 | 56.24       |             |           |             |                                        |
|              |     | 8.284  | 4.337       |             |           |             |                                        |
|              |     | 122.99 | 56.13       |             |           |             |                                        |
|              |     | 8.099  | 4.306       | 1.572-1.526 | 1.550     | 0.864-0.812 |                                        |
| Leu          | 18a | 122.72 | 55.29       | 42.66       | 27.05     | 23.62-24.98 |                                        |
|              |     | 8.095  | 4.332       |             |           |             |                                        |
|              |     | 122.72 | 55.29       |             |           |             |                                        |
|              |     | 8.069  | 4.232       |             |           |             |                                        |
|              |     | 123.22 | 55.48       |             |           |             |                                        |
|              |     | 8.088  | 4.237       |             |           |             |                                        |
|              |     | 123.39 | 55.48       |             |           |             |                                        |
|              |     | 8.009  | 4.167       | 1.73-1.64   | 1.30-1.25 | 1.449       | 3.149-3.104 $\epsilon$ CH <sub>2</sub> |
| Lys          | 73  | 122.05 | 56.68       | 33.39       | 25.13     | 30.58       | 41.80                                  |
| Lys          | 74  | 8.073  | 4.256       | 1.75-1.67   | 1.30-1.25 | 1.455       | 3.125 $\epsilon$ CH <sub>2</sub>       |
|              |     | 121.56 | 56.43       | 33.33       | 25.13     | 30.58       | 41.80                                  |
| Lys          | 75  | 8.009  | 4.162       | 1.73-1.64   | 1.30-1.25 | 1.448       | 3.120 $\epsilon$ CH <sub>2</sub>       |
|              |     | 122.05 | 56.68       | 33.39       | 25.13     | 30.58       | 41.80                                  |
| $\beta$ -Ala | 76  | 7.913  | 3.423-3.369 | 2.486       |           |             |                                        |
|              |     | 119.07 | 38.50       | 37.34       |           |             |                                        |

\*  $\alpha$ -D-GalNAc

$\beta$ -Ala : -NH-CH<sub>2</sub> $\alpha$ -CH<sub>2</sub> $\beta$ -COOH

For the a',b and b' residues, only chemical shifts different from the a residue are shown.

H $\gamma$ , H $\delta$ , H $\epsilon$ , NH $\epsilon$  of K73 and K74 may be switched.

Sequences from I15 to  $\beta$ -Ala :

-I15a-T16a-E17a-L18a-NHK73H $\alpha$ -NH $\epsilon$ K75H $\alpha$ -NH $\beta$ Ala

-I15a-T16a-E17a-L18a'-NHK74H $\alpha$ -NHK75

-I1b-T16b-E17b-L18b-NH $\epsilon$ K73 or 74

-I15a-T16a-E17a-L18b'-NH $\epsilon$ K73 or 74

B) <sup>1</sup>H, <sup>13</sup>C and <sup>15</sup>N NMR chemical shifts (in ppm) and coupling constants ( $J_{H,H}$  in Hz) of the GalNAc residues of the linear glycosylated peptide S\*T\*T\*QYIKANSKFIGITEL

|                                 | H1<br><sup>3</sup> J <sub>1,2</sub><br>C1 | H2<br><sup>3</sup> J <sub>2,3</sub><br>C2 | H3<br>C3       | H4<br>C4       | H5<br>C5       | H66'<br>C6       | H(Ac)<br>C     | HN<br><sup>3</sup> J <sub>NH,H2</sub><br>N |
|---------------------------------|-------------------------------------------|-------------------------------------------|----------------|----------------|----------------|------------------|----------------|--------------------------------------------|
| $\alpha$ -GalNAc-(1-O)-<br>Ser1 | 4.842<br>3.8 <sup>a</sup><br>101.09       | 4.151<br>9 <sup>b</sup><br>52.41          | 3.865<br>70.75 | 3.973<br>71.31 | 3.933<br>74.43 | 3.7-3.8<br>64.17 | 2.019<br>25.06 | 7.756<br>9.8 <sup>a</sup><br>121.40        |
| $\alpha$ -GalNAc-(1-O)-<br>Thr2 | 4.852<br>3.9 <sup>a</sup><br>101.91       | 4.070<br>9 <sup>b</sup><br>52.55          | 3.827<br>70.99 | 3.963<br>71.31 | 3.976<br>74.15 | 3.7-3.8<br>64.17 | 2.038<br>25.21 | 7.447<br>10.2 <sup>a</sup><br>122.14       |
| $\alpha$ -GalNAc-(1-O)-<br>Thr3 | 4.881<br>3.8 <sup>a</sup><br>101.50       | 4.132<br>9 <sup>b</sup><br>52.46          | 3.824<br>71.12 | 3.973<br>71.31 | 3.976<br>74.15 | 3.7-3.8<br>64.17 | 2.053<br>25.21 | 7.661<br>10.3 <sup>a</sup><br>122.09       |

<sup>a</sup>Digital resolution 1D <sup>1</sup>H spectrum : 0.2 Hz. <sup>b</sup>Digital resolution 2D <sup>1</sup>H spectrum : 1 Hz.

<sup>1</sup>H, <sup>13</sup>C and <sup>15</sup>N NMR chemical shifts (in ppm) the amino acid residues of the linear glycosylated peptide S\*T\*T\*QYIKANSKFIGITEL

|      | H <sub>N</sub><br>N | H $\alpha$<br>C $\alpha$ | H $\beta$<br>C $\beta$ | H $\gamma$<br>C $\gamma$ | H $\delta$<br>C $\delta$ | Other |
|------|---------------------|--------------------------|------------------------|--------------------------|--------------------------|-------|
| Ser* | 1                   | 4.48<br>55.8             | 4.237-4.003<br>69.20   |                          |                          |       |
| Thr* | 2                   | 9.006<br>112.8           | 4.78<br>79.99          | 1.308<br>21.20           |                          |       |
| Thr* | 3                   | 8.664                    | 4.53<br>4.229          | 1.189                    |                          |       |

|     |   |                         |                      |                               |                         |                            |                                       |                 |                     |
|-----|---|-------------------------|----------------------|-------------------------------|-------------------------|----------------------------|---------------------------------------|-----------------|---------------------|
| Gln | 4 | 111.3<br>8.319<br>119.7 | 59.3<br>4.31<br>55.3 | 79.01<br>1.994-1.908<br>30.54 | 20.98<br>2.317<br>33.81 |                            | 7.544-6.822 NH <sub>2</sub><br>112.14 |                 |                     |
| Tyr | 5 | 8.440<br>123.3          | 4.47<br>58.1         | 3.015-2.913<br>38.86          |                         |                            | 7.128 δCH<br>133.30                   | 6.800<br>118.32 |                     |
| Ile | 6 | 7.948<br>126.1          | 4.00<br>60.4         | 1.708<br>39.01                | 1.403-1.108<br>27.11    | 0.792<br>12.75             | 0.793 γCH <sub>3</sub><br>17.28       |                 |                     |
| Lys | 7 | 8.075<br>126.2          | 4.12<br>56.4         | 1.776-1.713<br>32.98          | 1.410<br>24.81          | 1.696<br>29.29             | 3.000 εCH <sub>2</sub><br>42.15       |                 |                     |
| Ala | 8 | 8.226<br>125.7          | 4.25<br>52.6         | 1.368<br>19.28                |                         |                            |                                       |                 |                     |
| Asn | 9 | 8.348<br>118.0          | 4.67<br>53.2         | 2.851-2.767<br>38.86          |                         |                            | 7.549-6.856 NH <sub>2</sub><br>112.52 |                 |                     |
| Ser | 1 | 8.148<br>116.2          | 4.37<br>58.7         | 3.865-3.813<br>63.91          |                         |                            |                                       |                 |                     |
| Lys | 1 | 8.192<br>122.5          | 4.24<br>56.4         | 1.675-1.628<br>32.87          | 1.269<br>24.67          | 1.603<br>29.05             | 2.928 εCH <sub>2</sub><br>42.15       |                 |                     |
| Phe | 1 | 8.125<br>121.0          | 4.64<br>57.6         | 3.122-2.991<br>39.56          |                         |                            | 7.226 δCH<br>131.92                   | 7.334<br>131.58 | 7.290 ζCH<br>129.94 |
| Ile | 1 | 7.927<br>123.1          | 4.12<br>61.1         | 1.807<br>38.82                | 1.424-1.137<br>27.18    | 0.827<br>13.03             | 0.866 γCH <sub>3</sub><br>17.42       |                 |                     |
| Gly | 1 | 7.957<br>112.2          | 3.89<br>45.3         |                               |                         |                            |                                       |                 |                     |
| Ile | 1 | 7.934<br>119.7          | 4.26<br>61.1         | 1.885<br>39.03                | 1.431-1.157<br>27.24    | 0.842<br>13.18             | 0.909 γCH <sub>3</sub><br>17.68       |                 |                     |
| Thr | 1 | 8.192<br>118.3          | 4.33<br>61.9         | 4.154<br>69.84                | 1.173<br>21.51          |                            |                                       |                 |                     |
| Glu | 1 | 8.263<br>123.8          | 4.38<br>55.8         | 2.102-1.932<br>29.43          | 2.380<br>33.71          |                            |                                       |                 |                     |
| Leu | 1 | 7.994<br>128.1          | 4.22<br>56.2         | 1.588<br>43.07                | 1.590<br>27.29          | 0.846-0.893<br>23.57-25.07 |                                       |                 |                     |

\* α-D-GalNAc

C) <sup>1</sup>H, <sup>13</sup>C and <sup>15</sup>N NMR chemical shifts (in ppm) of the amino acid residues of the non-glycosylated analogue STTQYIKANSKFIGITEL

|     |    | H <sub>N</sub>  | H <sub>α</sub> | H <sub>β</sub>  | H <sub>γ</sub>  | H <sub>δ</sub> | Other                                 |                     |                     |
|-----|----|-----------------|----------------|-----------------|-----------------|----------------|---------------------------------------|---------------------|---------------------|
|     |    | N               | C <sub>α</sub> | C <sub>β</sub>  | C <sub>γ</sub>  | C <sub>δ</sub> |                                       |                     |                     |
| Ser | 1  |                 | 4.233<br>57.28 | 3.986<br>62.99  |                 |                |                                       |                     |                     |
| Thr | 2  | 8.648<br>115.46 | 4.460<br>61.90 | 4.231<br>69.82  | 1.197<br>21.44  |                |                                       |                     |                     |
| Thr | 3  | 8.219<br>117.40 | 4.260<br>62.17 | 4.096<br>69.82  | 1.099<br>21.43  |                |                                       |                     |                     |
| Gln | 4  | 8.311<br>123.19 | 4.277<br>55.88 | 1.939-<br>29.63 | 2.204<br>33.74  |                | 7.392-6.791 NH <sub>2</sub><br>112.16 |                     |                     |
| Tyr | 5  | 8.194<br>122.13 | 4.542<br>57.78 | 2.978-<br>38.67 |                 |                | 7.044 δCH<br>133.26                   | 6.762 εCH<br>118.22 |                     |
| Ile | 6  | 7.969<br>123.66 | 4.051<br>60.80 | 1.755<br>38.92  | 1.403-<br>27.18 | 0.793<br>12.70 | 0.835 γCH <sub>3</sub><br>17.33       |                     |                     |
| Lys | 7  | 8.241<br>125.97 | 4.191<br>56.43 | 1.773-<br>32.91 | 1.400<br>24.72  | 1.657<br>29.09 | 2.964 εCH <sub>2</sub><br>42.21       |                     |                     |
| Ala | 8  | 8.258<br>125.57 | 4.246<br>52.60 | 1.348<br>19.25  |                 |                |                                       |                     |                     |
| Asn | 9  | 8.354<br>117.95 | 4.656<br>-     | 2.816-<br>38.77 |                 |                | 7.534-6.848 NH <sub>2</sub><br>112.57 |                     |                     |
| Ser | 10 | 8.145<br>116.17 | 4.351<br>58.62 | 3.849-<br>63.81 |                 |                |                                       |                     |                     |
| Lys | 11 | 8.190<br>122.49 | 4.226<br>56.42 | 1.773-<br>32.91 | 1.259<br>24.71  | 1.582<br>29.08 | 2.905 εCH <sub>2</sub><br>42.21       |                     |                     |
| Phe | 12 | 8.128<br>120.99 | 4.625<br>-     | 3.088-<br>39.49 |                 |                | 7.197 δCH<br>131.91                   | 7.300 εCH<br>131.50 | 7.266 ζCH<br>129.86 |
| Ile | 13 | 7.946<br>123.08 | 4.115<br>61.08 | 1.792<br>38.80  | 1.403-<br>27.18 | 0.826<br>12.95 | 0.835 γCH <sub>3</sub><br>17.33       |                     |                     |
| Gly | 14 | 7.965<br>112.26 | 3.874<br>45.21 |                 |                 |                |                                       |                     |                     |
| Ile | 15 | 7.943<br>119.82 | 4.245<br>61.09 | 1.866<br>38.93  | 1.403-<br>27.18 | 0.826<br>12.95 | 0.886 γCH <sub>3</sub><br>17.61       |                     |                     |
| Thr | 16 | 8.193<br>118.37 | 4.317<br>61.90 | 4.129<br>69.83  | 1.150<br>21.70  |                |                                       |                     |                     |
| Glu | 17 | 8.262           | 4.367          | 2.074-          | 2.367           |                |                                       |                     |                     |

|     |    |        |       |       |       |             |
|-----|----|--------|-------|-------|-------|-------------|
| Leu | 18 | 123.81 | 55.88 | 29.36 | 33.47 |             |
|     |    | 8.009  | 4.210 | 1.574 | 1.569 | 0.874-0.827 |
|     |    | 128.00 | 56.16 | 43.06 | 27.18 | 25.06-23.41 |

**Table S2.**

List of NOEs obtained for MAG-Tn3 in solution in 85% H<sub>2</sub>O at pH 3.9 and at a concentration of 0.77 M from a NOESY experiment acquired at 303 K and 14 T with a mixing time of 200 ms. The NOEs are classified in strong (s), medium (m) and weak (w) intensities.

| Intra residue   | Intensity | sequential         | Intensity | i,j+n, n>1          | Intensity |
|-----------------|-----------|--------------------|-----------|---------------------|-----------|
| nh, h1 GalNAc1  | w         | h1 GalNAc1, hb S1  | m         |                     |           |
| nh, h2 GalNAc1  | m         | h1 GalNAc1, hb' S1 | m         |                     |           |
| nh, h3 GalNAc1  | m         |                    |           |                     |           |
| nh, ch3 GalNAc1 | m         |                    |           |                     |           |
| h1, h2 GalNAc1  | m         |                    |           |                     |           |
| h1, h3 GalNAc1  | m         |                    |           |                     |           |
| h1, h5 GalNAc1  | w         |                    |           |                     |           |
| h2, h3 GalNAc1  | s         |                    |           |                     |           |
| nh, h1 GalNAc2  | m         | h1 GalNAc2, hb T2  | s         | nh GalNAc2, ha T3   | w         |
| nh, h2 GalNAc2  | m         | nh GalNAc2, nh T2  | w         |                     |           |
| nh, h3 GalNAc2  | m         | h66' GalNAc, hc T2 | m         |                     |           |
| nh, ch3 GalNAc2 | s         |                    |           |                     |           |
| h1, h2 GalNAc2  | m         |                    |           |                     |           |
| h1, h3 GalNAc2  | m         |                    |           |                     |           |
| h2, h3 GalNAc2  | s         |                    |           |                     |           |
| nh, h1 GalNAc3  | m         | h1 GalNAc3, hb T3  | s         | h1 GalNAc3, nh Q4   | m         |
| nh, h2 GalNAc3  | m         | nh GalNAc3, nh T3  | m         | nh GalNAc3, nh Q4   | w         |
| nh, h3 GalNAc3  | m         | ch3 GalNAc3, nh T3 | w         | ch3 GalNAc3, hb Y5  | w         |
| nh, ch3 GalNAc3 | s         | h66' GalNAc, hc T3 | m         | ch3 GalNAc3, hb' Y5 | w         |
| nh, h4 GalNAc3  | w         |                    |           | ch3 GalNAc3, nh Y5  | w         |
| h1, h2 GalNAc3  | m         |                    |           | ch3 GalNAc3, h26 Y5 | w         |
| h1, h3 GalNAc3  | w         |                    |           |                     |           |
| h2, h3 GalNAc3  | s         |                    |           |                     |           |
| ha, hb S1       | m         | ha S1, nh T2       | s         |                     |           |
| ha, hb' S1      | m         | hb S1, nh T2       | m         |                     |           |
| hb, hb' S1      | s         | h'b S1, nh T2      | w         |                     |           |
| ha, nh T2       | m         | ha T2, nh T3       | s         |                     |           |
| ha, hb T2       | m         | hb T2, nh T3       | m         |                     |           |
| nh, hb T2       | w         | ch3c T2, nh T3     | m         |                     |           |
| nh, ch3c T2     | m         |                    |           |                     |           |
| hb, hc T2       | m         |                    |           |                     |           |
| ha, nh T3       | m         | ha T3, nh Q4       | s         |                     |           |
| ha, hb T3       | m         | hb T3, nh Q4       | s         |                     |           |
| ha, hc T3       | w         | hc T3, nh Q4       | m         |                     |           |
| nh, hb T3       | m         | nh T3, nh Q4       | w         |                     |           |
| nh, ch3c T3     | m         |                    |           |                     |           |
| hb, hc T3       | s         |                    |           |                     |           |
| ha, nh Q4       | m         | ha Q4, nh Y5       | s         |                     |           |
| ha, hb Q4       | m         | ha Q4, h26 Y5      | w         |                     |           |
| ha, hb' Q4      | m         | hb Q4, nh Y5       | w         |                     |           |
| ha, hc Q4       | m         | h'b Q4, nh Y5      | m         |                     |           |
| nh, hb Q4       | m         | hc Q4, nh Y5       | w         |                     |           |
| nh, hb' Q4      | m         | nh Q4, nh Y5       | m         |                     |           |
| nh, hc Q4       | w         |                    |           |                     |           |
| nh2d Q4         | s         |                    |           |                     |           |
| ha, nh Y5       | m         | ha Y5, nh I6       | s         | h26 Y5, ha K7       | w         |
| ha, hb Y5       | m         | hb Y5, nh I6       | w         | h35 Y5, ha K7       | m         |
| ha, hb' Y5      | m         | h'b Y5, nh I6      | m         | h26 Y5, nh K7       | w         |
| ha, h26 Y5      | s         | h26 Y5, nh I6      | m         | h35 Y5, hb K7       | w         |
| hb, hb' Y5      | s         | nh Y5, nh I6       | w         |                     |           |
| nh, hb Y5       | s         |                    |           |                     |           |
| nh, h'b Y5      | m         |                    |           |                     |           |
| nh, h26 Y5      | m         |                    |           |                     |           |
| h26, hb' Y5     | s         |                    |           |                     |           |
| h26, hb Y5      | s         |                    |           |                     |           |
| h35, hb' Y5     | w         |                    |           |                     |           |
| h35, hb Y5      | w         |                    |           |                     |           |
| h26, h35 Y5     | s         |                    |           |                     |           |
| ha, nh I6       | m         | ha I6, nh K7       | s         | ch3c or d I6, nh A8 | w         |
| ha, hb I6       | m         | nh I6, nh K7       | m         |                     |           |



|                               |   |                     |   |                   |   |
|-------------------------------|---|---------------------|---|-------------------|---|
| ha, hc I6                     | w | ch3c or d I6, nh K7 | m |                   |   |
| ha, hc' I6                    | w |                     |   |                   |   |
| ha, ch3c or d I6              | s |                     |   |                   |   |
| hb, hc I6                     | w |                     |   |                   |   |
| hb,ch3c or d I6               | m |                     |   |                   |   |
| hc, hc' I6                    | s |                     |   |                   |   |
| hc, ch3d or c I6              | s |                     |   |                   |   |
| hc', ch3d or c I6             | m |                     |   |                   |   |
| nh, hb I6                     | m |                     |   |                   |   |
| nh, hc I6                     | m |                     |   |                   |   |
| nh, hc' I6                    | m |                     |   |                   |   |
| nh, ch3c I6                   | m |                     |   |                   |   |
| ha, nh K7                     | s | ha K7, nh A8        | s |                   |   |
| ha, hb K7                     | s | hb K7, nh A8        | w |                   |   |
| ha, hb' K7                    | s | h'b K7, nh A8       | m |                   |   |
| ha, hc K7                     | m | nh K7, nh A8        | m |                   |   |
| hc, hd K7                     | s |                     |   |                   |   |
| hc, he K7                     | w |                     |   |                   |   |
| hd, he K7                     | m |                     |   |                   |   |
| nh, hb K7                     | s |                     |   |                   |   |
| nh, hb' K7                    | m |                     |   |                   |   |
| nh, ch2c K7                   | w |                     |   |                   |   |
| ha, nh A8                     | s | ha A8, nh N9        | s | hb A8, nh S10     | w |
| ha, hb A8                     | s | nh A8, nh N9        | m |                   |   |
| nh, ch3b A8                   | s | ch3b A8, nh N9      | m |                   |   |
| ha, nh N9                     | m | ha N9, nh S10       | s | ha N9, nh K11     | w |
| ha, hb N9                     | w | hb N9, nh S10       | w | hb' N9, h26 F12   | w |
| ha, hb' N9                    | w | hb' N9, nh S10      | w |                   |   |
| hb, hb' N9                    | s | nh N9, nh S10       | m |                   |   |
| hb, nhc N9                    | w |                     |   |                   |   |
| hb, nhc' N9                   | m |                     |   |                   |   |
| hb', nhc N9                   | w |                     |   |                   |   |
| hb', nhc' N9                  | m |                     |   |                   |   |
| nh2c N9                       | s |                     |   |                   |   |
| nh, hb N9                     | m |                     |   |                   |   |
| nh, h'b N9                    | m |                     |   |                   |   |
| ha, nh S10                    | m | ha S10, nh K11      | s |                   |   |
| ha, hb S10                    | m | hb S10, nh K11      | m |                   |   |
| ha, hb' S10                   | m | h'b S10, nh K11     | m |                   |   |
| nh, hb S10                    | m | nh S10, nh K11      |   |                   |   |
| nh, h'b S10                   | m |                     |   |                   |   |
| ha, nh K11 + ha I15, nh T16b' | s | ha K11, nh F12      | s | ha K11, nh I13    | w |
| hc, hd K11                    | m | ha K11, h26 F12     | w |                   |   |
| hd, he K11                    | s | ch2b K11, nh F12    | m |                   |   |
| nh, hb K11                    | m | ch2c K11, nh F12    | w |                   |   |
| nh, hb' K11                   | m | nh K11, h26 F12     | w |                   |   |
| nh, hc K11                    | m | ch2e K11, h35 F12   | w |                   |   |
|                               |   | nh K11, nh F12      | m |                   |   |
| ha, nh F12                    | m | ha F12, nh I13      | s | h35 F12, ch2a G14 | w |
| ha, hb F12                    | w | hb F12, nh I13      | w | h35 F12, nh G14   | w |
| ha, hb' F12                   | w | hb' F12, nh I13     | m | h26 F12, ch2a G14 | w |
| ha, h26 F12                   | m | h26 F12, nh I13     | m | h35 F12, ch3d I15 | w |
| ha, h35 F12                   | m | h26 F12, ch3d I13   | w | h26 F12, hc' I15  | w |
| hb, hb' F12                   | s | nh F12, nh I13      | m |                   |   |
| hb, h26 F12                   | s |                     |   |                   |   |
| hb, h35 F12                   | m |                     |   |                   |   |
| hb', h26 F12                  | s |                     |   |                   |   |
| hb', h35 F12                  | m |                     |   |                   |   |
| h35, h26 F12                  | s |                     |   |                   |   |
| nh, hb F12                    | m |                     |   |                   |   |
| nh, hb' F12                   | m |                     |   |                   |   |
| nh, h26 F12                   | m |                     |   |                   |   |
| nh, h35 F12                   | w |                     |   |                   |   |
| ha, nh I13                    | m | ha I13, nh G14      | s |                   |   |
| ha, hc I13                    | m | ch3c I13, ha G14    | w |                   |   |
| ha, hc' I13                   | m | nh I13, ha G14      | w |                   |   |
| ha, ch3c I13                  | s |                     |   |                   |   |
| ha, ch3d I13                  | m |                     |   |                   |   |

|                              |   |                               |   |                           |   |
|------------------------------|---|-------------------------------|---|---------------------------|---|
| hb, hc' I13                  | m |                               |   |                           |   |
| hb, ch3c I13                 | m |                               |   |                           |   |
| hb, ch3d I13                 | m |                               |   |                           |   |
| hc, ch3d I13                 | s |                               |   |                           |   |
| hc', ch3d I13                | s |                               |   |                           |   |
| hc, hc' I13                  | s |                               |   |                           |   |
| nh, hb I13                   | m |                               |   |                           |   |
| nh, hc' I13                  | m |                               |   |                           |   |
| nh, hc I13                   | m |                               |   |                           |   |
| nh, ch3c I13                 | m |                               |   |                           |   |
| ha, nh G14                   | s | ha G14, nh I15a               | s |                           |   |
|                              |   | ha G14, nh I15b               | s |                           |   |
|                              |   | ha G14, ch3c I15              | w |                           |   |
| ha, nh I15a                  | m | ha I15, nh T16b               | s | ch3c I15, nh E17a         | w |
| ha, nh I15b                  | m | ha I15, nh T16a               | s | ch3c I15, nh E17a'        | w |
| ha, hb I15ab                 | m | ha I15ab, hc T16ab            | m | ch3c I15, nh E17b         | w |
| ha, hc' I15ab                | m | ha I15, nh T16b' + ha, nh K11 | s | ha I15b or L18b', nh E17b | w |
| ha, hd I15ab                 | m | hb I15, nh T16a               | w |                           |   |
| ha, ch3c I15ab               | s | hb I15, nh T16b               | m |                           |   |
| hb, hc' I15ab                | m | hb I15, nh T16b'              | w |                           |   |
| hb, ch3c I15ab               | s | ch3c I15, nh T16b'            | w |                           |   |
| hb, ch3d I15ab               | m | ch3c I15, nh T16a             | m |                           |   |
| hc, ch3c I15                 | s | ch3c I15, nh T16b             | m |                           |   |
| hc, ch3d I15                 | s | nh I15, nh T16                | m |                           |   |
| hc', ch3c I15                | m | nh I15a, ha T16ab             | w |                           |   |
| hc', ch3d I15                | s | nh I15b, ha T16ab             | w |                           |   |
| hc, hc' I15                  | s |                               |   |                           |   |
| nh, hb I15a                  | m |                               |   |                           |   |
| nh, hb I15b                  | m |                               |   |                           |   |
| nh, hc I15a                  | m |                               |   |                           |   |
| nh, hc I15b                  | m |                               |   |                           |   |
| nh, hc' I15a                 | m |                               |   |                           |   |
| nh, hc' I15b                 | m |                               |   |                           |   |
| nh, ch3c I15a                | m |                               |   |                           |   |
| nh, ch3c I15b                | m |                               |   |                           |   |
| nh, ch3d I15a                | m |                               |   |                           |   |
| nh, ch3d I15b                | m |                               |   |                           |   |
| ha, nh T16a                  | m | ha T16a + ha E17a, nh E17a    | s | ch3c T16ab, nh L18aa'b'   | w |
| ha, nh T16b                  | m | ha T16a + ha E17a', nh E17a'  | s |                           |   |
| ha, hb T16ab                 | s | ha T16b + ha E17b, nh E17b    | s |                           |   |
| ha, hb T16ab                 | s | hb T16a, nh E17a'             | m |                           |   |
| ha, hc T16ab                 | m | hb T16a, nh E17a              | m |                           |   |
| hb, hc T16ab                 | s | hb T16b, nh E17b              | m |                           |   |
| nh T16a, hb T16              | m | hc T16, nh E17a               | m |                           |   |
| nh T16b', hb T16             | m | hc T16, nh E17a'              | m |                           |   |
| nh, hc T16a                  | m | hc T16, nh E17b               | w |                           |   |
| nh, hc T16b'                 | m | nh T16a, nh E17a              | m |                           |   |
| nh T16b, hb T16              | m | nh T16b, nh E17b              | m |                           |   |
| nh, hc T16b                  | m |                               |   |                           |   |
| haT16a + ha E17a, nh E17a    | s |                               |   |                           |   |
| ha T16a + ha E17a', nh E17a' | s |                               |   |                           |   |
| ha T16b + ha E17b, nh E17b   | s |                               |   |                           |   |
| ha, hb E17ab                 | m | ha E17a, nh L18aa'            | s |                           |   |
| ha, hb' E17ab                | m | ha E17b, nh L18b              | s |                           |   |
| ha, hc E17ab                 | m | ha E17b, nh L18b'             | s |                           |   |
| nh, hb E17a                  | m | hb E17ab, nh L18aa'bb'        | w |                           |   |
| nh, h'b E17a                 | m | hb' E17ab, nh L18aa'bb'       | w |                           |   |
| nh, hb E17a'                 | m | hc E17ab, nh L18aa'bb'        | w |                           |   |
| nh, h'b E17a'                | m | nh E17a, nh L18aa'            | m |                           |   |
| nh, hb E17b                  | m | nh E17b, nh L18bb'            | m |                           |   |
| nh, hb' E17b                 | m |                               |   |                           |   |
| nh, hc E17a                  | m |                               |   |                           |   |
| nh, hc E17a'                 | m |                               |   |                           |   |
| nh, hc E17b                  | m |                               |   |                           |   |
| ha, nh L18a                  | s | ha L18a, nh K73               | m |                           |   |
| ha, nh L18a'                 | s | ha L18a', nh K74              | m |                           |   |
| ha, nh L18b                  | m | ha L18b, nhe K73              | m |                           |   |
| ha, nh L18b'                 | m | ha L18b', nhe K74             | m |                           |   |

|                            |   |                           |   |
|----------------------------|---|---------------------------|---|
| ha, ch2b L18aa'            | m | ha L18b, ch2e K73         | w |
| ha L18bb', ch2b + hc L18   | m | ha L18bb', hb K73 or K75  | m |
| ha, ch3d L18aa'            | m | ch2b + hc L18b, nhe K74   | w |
| ha, ch3d' L18aa'           | m | hc L18, nh K73 or K75     | w |
| hc, ch3d L18               | m | ch3dd' L18, ha K73 or K75 | w |
| hc, ch3d' L18              | s | nh L18b, nhe K73          | w |
| nh, ch2b + hc L18aa'bb'    | m | nh L18b', nhe K74         | w |
| nh, ch3d L18aa'bb'         | w |                           |   |
| nh, ch3d' L18aa'bb'        | w |                           |   |
| ha, nh K73 + K75           | m | ha K73, nhe K75           | m |
| ha, hb K73 + K75           | m | nh K73, nhe K75           | w |
| ha, hb' K73 + K75          | m | nh K73, nhe K75           | w |
| ha, hc K73 + K75           | m | hb' K73 or K75, nhe K75   | w |
| ha, hc' K73 + K75          | m |                           |   |
| ha, ch2d K73 + K75         | m |                           |   |
| ha, ch2e K73 + K75         | w |                           |   |
| hb, ch2e K73 + K74 + K75   | w |                           |   |
| hb', ch2e K73 + K74 + K75  | w |                           |   |
| ch2c, ch2e K73 + K74 + K75 | w |                           |   |
| ch2d, ch2e K73 + K74 + K75 | m |                           |   |
| nhe, ch2d K73              | m |                           |   |
| nhe, he K73                | m |                           |   |
| nhe, he' K73               | m |                           |   |
| nh, hb K73 + K75           | m |                           |   |
| nh, hb' K73 + K75          | m |                           |   |
| nh, hc K73 + K75           | m |                           |   |
| nh, hc' K73+ K75           | m |                           |   |
| nh, ch2d K73 + K75         | m |                           |   |
| ha, nh K74                 | m | ha K74, nh K75            | m |
| ha, hb K74                 | m |                           |   |
| ha, hb' K74                | m |                           |   |
| nh, hc K74                 | w |                           |   |
| nh, hc' K74                | w |                           |   |
| nhe, ch2d K74              | m |                           |   |
| nhe, ch2e K74              | m |                           |   |
| nhe, hc K75                | w | ha K75, nh b-Ala          | m |
| nhe, h'c K75               | w | hb' K75, nh b-Ala         | w |
| nhe, ch2d K75              | m | nh K75, nh b-Ala          | w |
| nhe, ch2e K75              | m |                           |   |
| ha, nh b-Ala               | m |                           |   |
| ha', nh b-Ala              | m |                           |   |
| hb, ch2b b-Ala             | w |                           |   |
| nh, ch2b b-Ala             | w |                           |   |

**Table S3.**

$^1\text{H}$ ,  $^1\text{H}$  NOEs between GalNAc and amino acid residues around the S\*T\*T\* antigen motif of MAG-Tn3. Strong, medium and weak NOEs are written in bold, normal and italic characters, respectively.

|                   | Ser1                | Thr2                                                                  | Thr3                                                                             | Gln4                    | Tyr5                                                                 |
|-------------------|---------------------|-----------------------------------------------------------------------|----------------------------------------------------------------------------------|-------------------------|----------------------------------------------------------------------|
| $\alpha$ -GalNAc1 | H1, H $\beta\beta'$ |                                                                       |                                                                                  |                         |                                                                      |
| $\alpha$ -GalNAc2 |                     | <b>H1, H<math>\beta</math></b><br>H66', CH3 $\gamma$<br><i>NH, NH</i> | <i>NH, H<math>\alpha</math></i>                                                  |                         |                                                                      |
| $\alpha$ -GalNAc3 |                     |                                                                       | <b>H1, H<math>\beta</math></b><br>NH, NH<br>H66', CH3 $\gamma$<br><i>CH3, NH</i> | H1, NH<br><i>NH, NH</i> | <i>CH3, NH</i><br>CH3, H2,6<br><i>CH3, H<math>\beta\beta'</math></i> |

### Supplementary References

- 1 D. S. Wishart and B. D. Sykes, *J. Biomol. NMR*, 1994, **4**, 171-180.
- 2 M. V. Berjanskii and D. S. Wishart, *J. Am. Chem. Soc.*, 2005, **127**, 14970-14971.
- 3 Y. Shen, F. Delaglio, G. Cornilescu and A. Bax, *J. Biomol. NMR*, 2009, **44**, 213-223.
- 4 A. Pardi, M. Billeter and K. Wuthrich, *J. Mol. Biol.*, 1984, **180**, 741-751.
- 5 A. Borgert, J. Heimburg-Molinaro, X. Song, Y. Lasanajak, T. Ju, M. Liu, P. Thompson, G. Ragupathi, G. Barany, D. F. Smith, R. D. Cummings and D. Live, *ACS Chem. Biol.*, 2012, **7**, 1031-1039.
- 6 D. M. Coltart, A. K. Royyuru, L. J. Williams, P. W. Glunz, D. Sames, S. D. Kuduk, J. B. Schwarz, X. T. Chen, S. J. Danishefsky and D. H. Live, *J. Am. Chem. Soc.*, 2002, **124**, 9833-9844.
- 7 F. Corzana, J. H. Busto, M. Garcia de Luis, J. Jimenez-Barbero, A. Avenoza and J. M. Peregrina, *Chemistry*, 2009, **15**, 3863-3874.
- 8 F. Corzana, J. H. Busto, G. Jimenez-Oses, M. Garcia de Luis, J. L. Asensio, J. Jimenez-Barbero, J. M. Peregrina and A. Avenoza, *J. Am. Chem. Soc.*, 2007, **129**, 9458-9467.
